# Supplementary material for: Effects of dietary tuna dark muscle enzymatic hydrolysis and cooking drip supplementations on growth performance, antioxidant activity and gut microbiota modulation of Bama mini-piglets
Source: Royal Society of Chemistry journal article supplement (doi:10.1039/c9ra02594d), 2019-01-01
Supplement: c9ra02594d1.pdf [file c9ra02594d1.pdf]

**Effects of dietary tuna dark muscle enzymatic hydrolysis and cooking drip supplementations on growth performance, antioxidant activity and gut microbiota modulation of Bama mini-piglets**

Jun Zhou<sup>1,2#</sup>, Mingyuan Yang<sup>1,2#</sup>, Jiaojiao Han<sup>1,2</sup>, Chenyang Lu<sup>1,2\*</sup>, Ye Li<sup>1,2</sup>,  
Xiurong Su<sup>1,2\*</sup>

<sup>1</sup>State Key Laboratory for Quality and Safety of Argo-products, Ningbo University, Ningbo, China

<sup>2</sup> School of Marine Science, Ningbo University, Ningbo, China

# These authors contributed equally to this work

**\* Corresponding authors**

Dr., Chenyang Lu

Address: State Key Laboratory for Quality and Safety of Argo-products, Ningbo University, 818 Fenghua Road, Ningbo, China

Tel: 86-0574-87608368, Fax: 86-0574-87608368

Email: luchenyang@nbu.edu.cn

Prof. Xiurong Su

Address: State Key Laboratory for Quality and Safety of Argo-products, Ningbo University, 818 Fenghua Road, Ningbo, China

Tel: 86-0574-87608368, Fax: 86-0574-87608368

Email: suxiurong\_public@163.com

**Table S1. The essential fatty acid composition of the swine diets.**

| Fatty acid (%)<br>(of total FA content) | Diets   |        |        |
|-----------------------------------------|---------|--------|--------|
|                                         | Control | EH-TDM | EH-TCD |
| Myristic acids C14:0                    | 0.54    | 0.58   | 0.63   |
| Palmitic acid C16:0                     | 14.09   | 14.37  | 14.58  |
| Stearic acid C18:0                      | 7.68    | 6.39   | 6.29   |
| Oleic acid C18:1                        | 27.88   | 26.77  | 26.99  |
| Linoleic acid C18:2                     | 40.64   | 42.86  | 42.39  |
| $\alpha$ -Linolenic acid C18:3          | 5.52    | 5.92   | 6.29   |
| Arachidonic acid<br>C20:4               | —       | —      | —      |
| Eicosapentaenoic<br>Acid C20:5          | —       | 0.62   | 0.92   |
| Docose Hexaenoie<br>Acid C22:6          | —       | 0.47   | 0.33   |

**Table S2. The chemical composition of the longissimus dorsi muscle in piglets fed experimental diets (mean±SEM).** The data marked with different letters represent significant differences between different groups ( $p<0.05$ ), whereas bars labelled with the same letter correspond to results that show no statistically significant differences.

| Chemical composition (%) | Longissimus dorsi muscle |                          |                          |
|--------------------------|--------------------------|--------------------------|--------------------------|
|                          | Control                  | EH-TDM                   | EH-TCD                   |
| Crude Protein            | 19.96 <sup>a</sup> ±0.23 | 21.65 <sup>b</sup> ±0.22 | 23.17 <sup>c</sup> ±0.34 |
| Crude Fat                | 2.09 <sup>a</sup> ±0.06  | 1.74 <sup>b</sup> ±0.25  | 1.81 <sup>b</sup> ±0.09  |
| Ash                      | 1.23 <sup>a</sup> ±0.03  | 1.17 <sup>a</sup> ±0.02  | 1.21 <sup>a</sup> ±0.05  |
| Moisture                 | 71.90 <sup>a</sup> ±0.94 | 75.15 <sup>b</sup> ±1.00 | 76.32 <sup>b</sup> ±1.26 |

**Table S3. The essential amino acid composition of the longissimus dorsi muscle (mean±SEM).** The data marked with different letters represent significant differences between different groups ( $p<0.05$ ), whereas bars labelled with the same letter correspond to results that show no statistically significant differences.

| Essential amino acids (mg/g) | Longissimus dorsi muscle |                         |                         |
|------------------------------|--------------------------|-------------------------|-------------------------|
|                              | Control                  | EH-TDM                  | EH-TCD                  |
| Arginine                     | 4.21 <sup>a</sup> ±0.07  | 4.46 <sup>a</sup> ±0.26 | 4.65 <sup>b</sup> ±0.52 |
| Histidine                    | 1.82 <sup>a</sup> ±0.01  | 2.69 <sup>b</sup> ±0.02 | 1.97 <sup>a</sup> ±0.42 |
| Isoleucine                   | 3.93 <sup>a</sup> ±0.07  | 3.98 <sup>a</sup> ±0.23 | 4.75 <sup>b</sup> ±0.53 |
| Leucine                      | 5.76 <sup>a</sup> ±0.10  | 5.32 <sup>a</sup> ±0.31 | 6.51 <sup>b</sup> ±0.73 |
| Lysine                       | 1.07 <sup>a</sup> ±0.02  | 0.95 <sup>a</sup> ±0.05 | 1.13 <sup>a</sup> ±0.13 |
| Methionine                   | 4.54 <sup>a</sup> ±0.08  | 4.59 <sup>a</sup> ±0.27 | 5.22 <sup>b</sup> ±0.58 |
| Phenylalanine                | 1.59 <sup>a</sup> ±0.03  | 1.46 <sup>a</sup> ±0.09 | 1.47 <sup>a</sup> ±0.16 |
| Threonine                    | 4.73 <sup>a</sup> ±0.08  | 5.00 <sup>a</sup> ±0.29 | 4.05 <sup>b</sup> ±0.45 |
| Tryptophan                   | 0.42 <sup>a</sup> ±0.01  | 0.29 <sup>b</sup> ±0.02 | 0.37 <sup>a</sup> ±0.42 |
| Valine                       | 0.26 <sup>a</sup> ±0.01  | 0.29 <sup>a</sup> ±0.02 | 0.27 <sup>a</sup> ±0.03 |

**Table S4. The essential fatty acid composition of the longissimus dorsi muscle (mean).**

| Fatty acid (%)<br>(of total FA content) | Longissimus dorsi muscle |        |        |
|-----------------------------------------|--------------------------|--------|--------|
|                                         | Control                  | EH-TDM | EH-TCD |
| Myristic acids C14:0                    | 1.41                     | 1.15   | 0.79   |
| Palmitic acid C16:0                     | 19.54                    | 21.94  | 23.93  |
| Stearic acid C18:0                      | 14.78                    | 13.71  | 12.11  |
| Oleic acid C18:1                        | 4.55                     | 2.95   | 2.75   |
| Linoleic acid C18:2                     | 22.13                    | 19.36  | 19.25  |
| $\alpha$ -Linolenic acid C18:3          | 2.10                     | 4.40   | 3.03   |
| Arachidonic acid C20:4                  | —                        | 0.51   | 0.45   |
| Eicosapentaenoic Acid<br>C20:5          | 0.22                     | 1.08   | 0.85   |
| Docose Hexaenoie<br>Acid C22:6          | 0.15                     | 0.45   | 0.39   |

**Table S5. Alpha diversity of the sequencing analysis of 16S rDNA from microbiota in the fecal matter of pigs**

| Item            | Control | EH-TDM   | EH-TCD   |
|-----------------|---------|----------|----------|
| Sequence number | 21846   | 41171    | 42129    |
| OUT number      | 1249    | 4003     | 3391     |
| Coverage        | 0.9652  | 0.9394   | 0.9513   |
| ACE index       | 5202.49 | 16155.90 | 13234.26 |
| Chao1 index     | 3323.96 | 10238.00 | 8337.53  |
| Shannon index   | 3.8824  | 5.4010   | 5.2489   |
| Simpson index   | 0.0785  | 0.0273   | 0.0269   |

**Table S6. The RDP classification of the sequences from the three groups at the phylum level.**

| Phylum (%)       | Control | EH-TDM | EH-TCD |
|------------------|---------|--------|--------|
| Firmicutes       | 89.65   | 53.54  | 52.11  |
| unclassified     | 5.18    | 13.32  | 19.08  |
| Proteobacteria   | 3.00    | 16.98  | 17.06  |
| Bacteroidetes    | 1.24    | 12.32  | 7.85   |
| Planctomycetes   | 0.27    | 1.08   | 1.31   |
| Chloroflexi      | 0.22    | 0.89   | 0.79   |
| Gemmatimonadetes | 0.18    | 0.48   | 0.53   |
| Cyanobacteria    | 0.08    | 0.06   | 0.15   |
| Verrucomicrobia  | 0.06    | 0.41   | 0.26   |
| others           | 0.12    | 0.92   | 0.86   |

**Table S7. The RDP classification of the sequences from the three groups at the family level.**

| Family (%)            | Control | EH-TDM | EH-TCD |
|-----------------------|---------|--------|--------|
| Ruminococcaceae       | 71.06   | 36.87  | 31.93  |
| unclassified          | 4.55    | 10.56  | 17.14  |
| Lactobacillaceae      | 3.9     | 5.57   | 4.65   |
| Streptococcaceae      | 2.55    | 0.55   | 0.64   |
| Enterobacteriaceae    | 0.75    | 4.35   | 6.1    |
| Porphyromonadaceae    | 0.33    | 3.84   | 2.19   |
| Lachnospiraceae       | 4.94    | 3.5    | 4.44   |
| Peptostreptococcaceae | 6.78    | 2.81   | 7.42   |
| Rikenellaceae         | 0.27    | 2.38   | 1.83   |
| Prevotellaceae        | 0.04    | 2.26   | 0.58   |
| others                | 4.83    | 27.31  | 23.08  |



1 **Table S8. The eighteen most abundant genera within the three groups.**

| Genus                                     | Phylum         | Class               | Order             | Family                | Control (%) | EH-TDM (%) | EH-TCD (%) |
|-------------------------------------------|----------------|---------------------|-------------------|-----------------------|-------------|------------|------------|
| <i>unclassified_Ruminococcaceae</i>       | Firmicutes     | Clostridia          | Clostridiales     | Ruminococcaceae       | 2.9         | 28.09      | 18.86      |
| <i>unclassified</i>                       | —              | —                   | —                 | —                     | 4.55        | 10.56      | 17.14      |
| <i>Subdoligranulum</i>                    | Firmicutes     | Clostridia          | Clostridiales     | Clostridiaceae        | 67.8        | 5.28       | 11.14      |
| <i>unclassified_Peptostreptococcaceae</i> | Firmicutes     | Clostridia          | Clostridiales     | Peptostreptococcaceae | 6.78        | 2.81       | 7.4        |
| <i>Lactobacillus</i>                      | Firmicutes     | Bacilli             | Lactobacillales   | Lactobacillaceae      | 3.9         | 5.56       | 4.64       |
| <i>Citrobacter</i>                        | Proteobacteria | Gammaproteobacteria | Enterobacteriales | Enterobacteriaceae    | 0.27        | 1.14       | 2.85       |
| <i>unclassified_Porphyrmonadaceae</i>     | Bacteroidetes  | Bacteroidia         | Bacteroidales     | Porphyromonadaceae    | 0.31        | 2.93       | 2.06       |
| <i>unclassified_Lachnospiraceae</i>       | Firmicutes     | Clostridia          | Clostridiales     | Lachnospiraceae       | 4.06        | 2.09       | 1.88       |
| <i>Alistipes</i>                          | Bacteroidetes  | Bacteroidia         | Bacteroidales     | Rikenellaceae         | 0.25        | 2.37       | 1.81       |
| <i>Blautia</i>                            | Firmicutes     | Clostridia          | Clostridiales     | Lachnospiraceae       | 0.53        | 0.85       | 1.38       |
| <i>Enterobacter</i>                       | Proteobacteria | Gammaproteobacteria | Enterobacteriales | Enterobacteriaceae    | 0.1         | 0.61       | 1.33       |
| <i>Pseudomonas</i>                        | Proteobacteria | Gammaproteobacteria | Pseudomonadales   | Pseudomonadaceae      | 0.29        | 1.31       | 1.22       |
| <i>Rhodobacter</i>                        | Proteobacteria | Alphaproteobacteria | Rhodobacterales   | Rhodobacteraceae      | 0           | 0.25       | 1.15       |
| <i>Serratia</i>                           | Proteobacteria | Gammaproteobacteria | Enterobacteriales | Enterobacteriaceae    | 0.29        | 1.65       | 1.12       |
| <i>Ruminococcus</i>                       | Firmicutes     | Clostridia          | Clostridiales     | Ruminococcaceae       | 0.02        | 2.29       | 1.06       |
| <i>Streptococcus</i>                      | Firmicutes     | Bacilli             | Lactobacillales   | Streptococcaceae      | 2.47        | 0.19       | 0.35       |
| <i>unclassified_Christensenellaceae</i>   | Firmicutes     | Clostridia          | Clostridiales     | Christensenellaceae   | 0.04        | 1.27       | 0.33       |
| <i>Prevotella</i>                         | Bacteroidetes  | Bacteroidia         | Bacteroidales     | Prevotellaceae        | 0.02        | 1.41       | 0.17       |
| others                                    | —              | —                   | —                 | —                     | 5.42        | 29.34      | 24.11      |

2

3

4 **Table S9. The taxonomic assignments of 100 OTUs that changed upon EH-TDM and EH-TCD treatment as identified by the**  
5 **RDA.**

| OTU name | Phylum         | Class            | Order              | Family                | Genus                                     |
|----------|----------------|------------------|--------------------|-----------------------|-------------------------------------------|
| OTU4667  | Firmicutes     | Clostridia       | Clostridiales      | Ruminococcaceae       | <i>Ruminococcus</i>                       |
| OTU1207  | Firmicutes     | Bacilli          | Lactobacillales    | Lactobacillaceae      | <i>Lactobacillus</i>                      |
| OTU4228  | Firmicutes     | Clostridia       | Clostridiales      | Ruminococcaceae       | <i>unclassified_Ruminococcaceae</i>       |
| OTU0027  | Firmicutes     | Bacilli          | Lactobacillales    | Lactobacillaceae      | <i>Lactobacillus</i>                      |
| OTU4396  | Firmicutes     | Clostridia       | Clostridiales      | Ruminococcaceae       | <i>unclassified_Ruminococcaceae</i>       |
| OTU3881  | Firmicutes     | Clostridia       | Clostridiales      | Ruminococcaceae       | <i>unclassified_Ruminococcaceae</i>       |
| OTU4290  | Firmicutes     | Clostridia       | Clostridiales      | Ruminococcaceae       | <i>unclassified_Ruminococcaceae</i>       |
| OTU3754  | Firmicutes     | Clostridia       | Clostridiales      | Ruminococcaceae       | <i>unclassified_Ruminococcaceae</i>       |
| OTU4390  | Firmicutes     | Clostridia       | Clostridiales      | Ruminococcaceae       | <i>unclassified_Ruminococcaceae</i>       |
| OTU0018  | Firmicutes     | Bacilli          | Lactobacillales    | Lactobacillaceae      | <i>Lactobacillus</i>                      |
| OTU0891  | Firmicutes     | Clostridia       | Clostridiales      | Ruminococcaceae       | <i>Faecalibacterium</i>                   |
| OTU5312  | Firmicutes     | Clostridia       | Clostridiales      | Ruminococcaceae       | <i>Subdoligranulum</i>                    |
| OTU3882  | Firmicutes     | Clostridia       | Clostridiales      | Ruminococcaceae       | <i>Ruminococcus</i>                       |
| OTU5534  | Firmicutes     | Clostridia       | Clostridiales      | Ruminococcaceae       | <i>Ruminococcus</i>                       |
| OTU2872  | Firmicutes     | Erysipelotrichia | Erysipelotrichales | Erysipelotrichaceae   | <i>unclassified_Erysipelotrichaceae</i>   |
| OTU3920  | Firmicutes     | Clostridia       | Clostridiales      | Ruminococcaceae       | <i>unclassified_Ruminococcaceae</i>       |
| OTU0023  | Firmicutes     | Bacilli          | Bacillales         | Bacillaceae           | <i>Bacillus</i>                           |
| OTU1501  | Firmicutes     | Bacilli          | Lactobacillales    | Lactobacillaceae      | <i>Lactobacillus</i>                      |
| OTU1081  | Firmicutes     | Bacilli          | Lactobacillales    | Lactobacillaceae      | <i>Lactobacillus</i>                      |
| OTU4178  | Actinobacteria | Coriobacteriia   | Coriobacteriales   | Coriobacteriaceae     | <i>Enterorhabdus</i>                      |
| OTU0332  | Firmicutes     | Bacilli          | Lactobacillales    | Lactobacillaceae      | <i>Lactobacillus</i>                      |
| OTU5944  | Firmicutes     | Clostridia       | Clostridiales      | Peptostreptococcaceae | <i>unclassified_Peptostreptococcaceae</i> |

|         |                |                     |                   |                     |                                         |
|---------|----------------|---------------------|-------------------|---------------------|-----------------------------------------|
| OTU1286 | Firmicutes     | Bacilli             | Lactobacillales   | Lactobacillaceae    | <i>Lactobacillus</i>                    |
| OTU1584 | Firmicutes     | Bacilli             | Lactobacillales   | Streptococcaceae    | <i>Streptococcus</i>                    |
| OTU0257 | Proteobacteria | Betaproteobacteria  | Burkholderiales   | Comamonadaceae      | <i>Variovorax</i>                       |
| OTU0673 | Firmicutes     | Bacilli             | Lactobacillales   | Lactobacillaceae    | <i>Lactobacillus</i>                    |
| OTU3914 | Firmicutes     | Clostridia          | Clostridiales     | Christensenellaceae | <i>unclassified_Christensenellaceae</i> |
| OTU0016 | Firmicutes     | Bacilli             | Lactobacillales   | Lactobacillaceae    | <i>Lactobacillus</i>                    |
| OTU3704 | Actinobacteria | Coriobacteriia      | Coriobacteriales  | Coriobacteriaceae   | <i>Olsenella</i>                        |
| OTU0033 | Firmicutes     | Bacilli             | Lactobacillales   | Lactobacillaceae    | <i>Lactobacillus</i>                    |
| OTU4053 | Firmicutes     | Clostridia          | Clostridiales     | Christensenellaceae | <i>unclassified_Christensenellaceae</i> |
| OTU1345 | Proteobacteria | Gammaproteobacteria | Enterobacteriales | Enterobacteriaceae  | <i>Serratia</i>                         |
| OTU0765 | Proteobacteria | Gammaproteobacteria | Enterobacteriales | Enterobacteriaceae  | <i>Enterobacter</i>                     |
| OTU0541 | Firmicutes     | Clostridia          | Clostridiales     | Ruminococcaceae     | <i>Faecalibacterium</i>                 |
| OTU2446 | Bacteroidetes  | Bacteroidia         | Bacteroidales     | Bacteroidaceae      | <i>Bacteroides</i>                      |
| OTU4852 | Firmicutes     | Clostridia          | Clostridiales     | Ruminococcaceae     | <i>Ruminococcus</i>                     |
| OTU2695 | Bacteroidetes  | Bacteroidia         | Bacteroidales     | Prevotellaceae      | <i>Prevotella</i>                       |
| OTU4037 | Firmicutes     | Clostridia          | Clostridiales     | Christensenellaceae | <i>unclassified_Christensenellaceae</i> |
| OTU0911 | Firmicutes     | Bacilli             | Lactobacillales   | Lactobacillaceae    | <i>Lactobacillus</i>                    |
| OTU0024 | Proteobacteria | Gammaproteobacteria | Xanthomonadales   | Xanthomonadaceae    | <i>Stenotrophomonas</i>                 |
| OTU0505 | Firmicutes     | Bacilli             | Lactobacillales   | Lactobacillaceae    | <i>Lactobacillus</i>                    |
| OTU1127 | Proteobacteria | Gammaproteobacteria | Enterobacteriales | Enterobacteriaceae  | <i>Pantoea</i>                          |
| OTU3078 | Bacteroidetes  | Bacteroidia         | Bacteroidales     | Rikenellaceae       | <i>Alistipes</i>                        |
| OTU0759 | Firmicutes     | Clostridia          | Clostridiales     | Lachnospiraceae     | <i>Blautia</i>                          |
| OTU1307 | Proteobacteria | Gammaproteobacteria | Enterobacteriales | Enterobacteriaceae  | <i>Citrobacter</i>                      |
| OTU2422 | Bacteroidetes  | Bacteroidia         | Bacteroidales     | Porphyromonadaceae  | <i>unclassified_Porphyromonadaceae</i>  |
| OTU0133 | Proteobacteria | Gammaproteobacteria | Enterobacteriales | Enterobacteriaceae  | <i>Escherichia-Shigella</i>             |
| OTU3665 | Actinobacteria | Actinobacteria      | Bifidobacteriales | Bifidobacteriaceae  | <i>Bifidobacterium</i>                  |

|         |                |                     |                    |                       |                                           |
|---------|----------------|---------------------|--------------------|-----------------------|-------------------------------------------|
| OTU0125 | Firmicutes     | Bacilli             | Lactobacillales    | Lactobacillaceae      | <i>Lactobacillus</i>                      |
| OTU4811 | Firmicutes     | Clostridia          | Clostridiales      | Ruminococcaceae       | <i>Ruminococcus</i>                       |
| OTU4957 | Firmicutes     | Clostridia          | Clostridiales      | Ruminococcaceae       | <i>Ruminococcus</i>                       |
| OTU0436 | Firmicutes     | Bacilli             | Lactobacillales    | Lactobacillaceae      | <i>Lactobacillus</i>                      |
| OTU5189 | Firmicutes     | Clostridia          | Clostridiales      | Ruminococcaceae       | <i>Ruminococcus</i>                       |
| OTU5292 | Actinobacteria | Coriobacteriia      | Coriobacteriales   | Coriobacteriaceae     | <i>Collinsella</i>                        |
| OTU0029 | Proteobacteria | Gammaproteobacteria | Pseudomonadales    | Pseudomonadaceae      | <i>Pseudomonas</i>                        |
| OTU2548 | Bacteroidetes  | Bacteroidia         | Bacteroidales      | Porphyromonadaceae    | <i>Barnesiella</i>                        |
| OTU0536 | Firmicutes     | Bacilli             | Lactobacillales    | Lactobacillaceae      | <i>Lactobacillus</i>                      |
| OTU4488 | Firmicutes     | Clostridia          | Clostridiales      | Ruminococcaceae       | <i>unclassified_Ruminococcaceae</i>       |
| OTU0907 | Firmicutes     | Bacilli             | Lactobacillales    | Lactobacillaceae      | <i>Lactobacillus</i>                      |
| OTU0028 | Firmicutes     | Bacilli             | Lactobacillales    | Streptococcaceae      | <i>Streptococcus</i>                      |
| OTU0291 | Firmicutes     | Clostridia          | Clostridiales      | Lachnospiraceae       | <i>Blautia</i>                            |
| OTU3034 | Firmicutes     | Erysipelotrichia    | Erysipelotrichales | Erysipelotrichaceae   | <i>Solobacterium</i>                      |
| OTU2458 | Bacteroidetes  | Bacteroidia         | Bacteroidales      | Prevotellaceae        | <i>Prevotella</i>                         |
| OTU4039 | Firmicutes     | Clostridia          | Clostridiales      | Ruminococcaceae       | <i>Subdoligranulum</i>                    |
| OTU0032 | Firmicutes     | Bacilli             | Lactobacillales    | Lactobacillaceae      | <i>Lactobacillus</i>                      |
| OTU6015 | Firmicutes     | Clostridia          | Clostridiales      | Peptostreptococcaceae | <i>unclassified_Peptostreptococcaceae</i> |
| OTU0143 | Firmicutes     | Bacilli             | Lactobacillales    | Enterococcaceae       | <i>Enterococcus</i>                       |
| OTU4352 | Actinobacteria | Coriobacteriia      | Coriobacteriales   | Coriobacteriaceae     | <i>Collinsella</i>                        |
| OTU4648 | Firmicutes     | Clostridia          | Clostridiales      | Ruminococcaceae       | <i>Subdoligranulum</i>                    |
| OTU1444 | Firmicutes     | Bacilli             | Lactobacillales    | Lactobacillaceae      | <i>Lactobacillus</i>                      |
| OTU1401 | Firmicutes     | Bacilli             | Lactobacillales    | Lactobacillaceae      | <i>Lactobacillus</i>                      |
| OTU5334 | Firmicutes     | Clostridia          | Clostridiales      | Ruminococcaceae       | <i>unclassified_Ruminococcaceae</i>       |
| OTU0031 | Firmicutes     | Bacilli             | Lactobacillales    | Lactobacillaceae      | <i>Lactobacillus</i>                      |
| OTU5171 | Proteobacteria | Alphaproteobacteria | Rhodobacterales    | Rhodobacteraceae      | <i>Rhodobacter</i>                        |

|         |                |                     |                    |                     |                                     |
|---------|----------------|---------------------|--------------------|---------------------|-------------------------------------|
| OTU4387 | Actinobacteria | Coriobacteriia      | Coriobacteriales   | Coriobacteriaceae   | <i>Slackia</i>                      |
| OTU1541 | Firmicutes     | Bacilli             | Lactobacillales    | Lactobacillaceae    | <i>Lactobacillus</i>                |
| OTU5766 | Firmicutes     | Clostridia          | Clostridiales      | Ruminococcaceae     | <i>Subdoligranulum</i>              |
| OTU4986 | Firmicutes     | Clostridia          | Clostridiales      | Lachnospiraceae     | <i>unclassified_Lachnospiraceae</i> |
| OTU5444 | Firmicutes     | Clostridia          | Clostridiales      | Ruminococcaceae     | <i>Subdoligranulum</i>              |
| OTU0186 | Proteobacteria | Betaproteobacteria  | Burkholderiales    | Burkholderiaceae    | <i>Burkholderia</i>                 |
| OTU5266 | Firmicutes     | Clostridia          | Clostridiales      | Lachnospiraceae     | <i>unclassified_Lachnospiraceae</i> |
| OTU5452 | Firmicutes     | Clostridia          | Clostridiales      | Ruminococcaceae     | <i>Subdoligranulum</i>              |
| OTU2219 | Firmicutes     | Erysipelotrichia    | Erysipelotrichales | Erysipelotrichaceae | <i>Solobacterium</i>                |
| OTU1834 | Firmicutes     | Bacilli             | Lactobacillales    | Lactobacillaceae    | <i>Lactobacillus</i>                |
| OTU0015 | Proteobacteria | Gammaproteobacteria | Enterobacteriales  | Enterobacteriaceae  | <i>Citrobacter</i>                  |
| OTU5268 | Firmicutes     | Clostridia          | Clostridiales      | Ruminococcaceae     | <i>Subdoligranulum</i>              |
| OTU5054 | Firmicutes     | Clostridia          | Clostridiales      | Ruminococcaceae     | <i>Subdoligranulum</i>              |
| OTU1482 | Firmicutes     | Bacilli             | Lactobacillales    | Lactobacillaceae    | <i>Lactobacillus</i>                |
| OTU3731 | Actinobacteria | Actinobacteria      | Bifidobacteriales  | Bifidobacteriaceae  | <i>Aeriscardovia</i>                |
| OTU5877 | Firmicutes     | Clostridia          | Clostridiales      | Ruminococcaceae     | <i>Anaerotruncus</i>                |
| OTU2978 | Firmicutes     | Erysipelotrichia    | Erysipelotrichales | Erysipelotrichaceae | <i>Solobacterium</i>                |
| OTU1614 | Firmicutes     | Bacilli             | Lactobacillales    | Streptococcaceae    | <i>Streptococcus</i>                |
| OTU1507 | Firmicutes     | Bacilli             | Lactobacillales    | Streptococcaceae    | <i>Streptococcus</i>                |
| OTU4051 | Firmicutes     | Clostridia          | Clostridiales      | Ruminococcaceae     | <i>unclassified_Ruminococcaceae</i> |
| OTU1615 | Firmicutes     | Bacilli             | Lactobacillales    | Streptococcaceae    | <i>Streptococcus</i>                |
| OTU5622 | Firmicutes     | Clostridia          | Clostridiales      | Ruminococcaceae     | <i>unclassified_Ruminococcaceae</i> |
| OTU1635 | Firmicutes     | Clostridia          | Clostridiales      | Lachnospiraceae     | <i>Blautia</i>                      |
| OTU3774 | Actinobacteria | Actinobacteria      | Bifidobacteriales  | Bifidobacteriaceae  | <i>Aeriscardovia</i>                |
| OTU4064 | Firmicutes     | Clostridia          | Clostridiales      | Ruminococcaceae     | <i>unclassified_Ruminococcaceae</i> |
| OTU4301 | Firmicutes     | Clostridia          | Clostridiales      | Ruminococcaceae     | <i>unclassified_Ruminococcaceae</i> |

**Table S10. The relative abundance of the 100 OTUs that changed upon EH-TDM and EH-TCD treatment as identified by the RDA.**

| OUT name | Species                                                | Control (%) | EH-TDM (%) | EH-TCD (%) |
|----------|--------------------------------------------------------|-------------|------------|------------|
| OTU4667  | <i>uncultured_bacterium</i>                            | 0           | 11.58414   | 4.878243   |
| OTU1207  | <i>uncultured_bacterium</i>                            | 5.453865    | 8.163577   | 6.739154   |
| OTU4228  | <i>uncultured_Ruminococcaceae_bacterium</i>            | 0           | 5.195697   | 2.124096   |
| OTU0027  |                                                        |             |            |            |
| OTUs     | <i>uncultured_bacterium</i>                            | 1.043959    | 3.270517   | 0.398766   |
| OTU4396  | <i>uncultured_bacterium</i>                            | 0.004681    | 2.690674   | 0.451935   |
| OTU3881  | <i>uncultured_bacterium</i>                            | 0.341744    | 2.644897   | 0.194066   |
| OTU4290  | <i>uncultured_bacterium</i>                            | 0.06554     | 2.573688   | 1.914079   |
| OTU3754  | <i>uncultured_bacterium</i>                            | 0.028089    | 2.090486   | 0.786899   |
| OTU4390  | <i>uncultured_bacterium</i>                            | 0.009363    | 2.067597   | 0.132922   |
| OTU0018  | <i>uncultured_Lactobacillus_sp.</i>                    | 7.551145    | 1.640345   | 13.39324   |
| OTU0891  | <i>uncultured_bacterium</i>                            | 0           | 1.330078   | 0.17014    |
| OTU5312  | <i>uncultured_bacterium</i>                            | 16.03857    | 1.078304   | 1.948639   |
| OTU3882  | <i>uncultured_bacterium</i>                            | 0           | 1.045243   | 1.026159   |
| OTU5534  | <i>uncultured_bacterium</i>                            | 1.619774    | 0.854505   | 1.733305   |
| OTU2872  | <i>uncultured_bacterium</i>                            | 0.592851    | 0.830612   | 0.708996   |
| OTU3920  | <i>uncultured_bacterium</i>                            | 0           | 0.821444   | 0.061144   |
| OTU0023  | <i>uncultured_Bacillus_sp.</i>                         | 0.107673    | 0.793469   | 0.805508   |
| OTU1501  | <i>uncultured_bacterium</i>                            | 5.238519    | 0.775667   | 1.751914   |
| OTU1081  | <i>Lactobacillus_reuteri_ATCC_53608</i>                | 0.26216     | 0.770581   | 0.108996   |
| OTU4178  | <i>uncultured_bacterium</i>                            | 0           | 0.768666   | 0.350915   |
| OTU0332  | <i>uncultured_bacterium</i>                            | 0           | 0.747692   | 0.026584   |
| OTU5944  | <i>uncultured_bacterium</i>                            | 1.807032    | 0.671397   | 1.531263   |
| OTU1286  | <i>Lactobacillus_delbrueckii_subsp._bulgaricus</i>     | 0.004681    | 0.503548   | 0.06912    |
| OTU1584  | <i>uncultured_bacterium</i>                            | 19.57305    | 0.488289   | 2.735538   |
| OTU0257  | <i>bacterium_enrichment_culture_clone_heteroB90_4W</i> | 0.051496    | 0.462857   | 0.340281   |
| OTU0673  | <i>Lactobacillus_reuteri_ATCC_53608</i>                | 0.145124    | 0.455227   | 0.643343   |
| OTU3914  | <i>uncultured_bacterium</i>                            | 0           | 0.439968   | 0.002658   |
| OTU0016  | <i>uncultured_bacterium</i>                            | 0.182576    | 0.432339   | 1.145789   |
| OTU3704  | <i>uncultured_bacterium</i>                            | 0.173213    | 0.419623   | 0.263186   |
| OTU0033  | <i>uncultured_bacterium</i>                            | 1.844483    | 0.406907   | 0.935772   |
| OTU4053  | <i>uncultured_bacterium</i>                            | 0           | 0.371303   | 0          |
| OTU1345  | <i>uncultured_bacterium</i>                            | 0.06554     | 0.350958   | 0.212675   |
| OTU0765  | <i>uncultured_bacterium</i>                            | 0.056177    | 0.350958   | 0.571565   |
| OTU0541  | <i>uncultured_bacterium</i>                            | 0           | 0.350958   | 0.260527   |
| OTU2446  | <i>uncultured_bacterium</i>                            | 0.093629    | 0.345871   | 0.215334   |
| OTU4852  | <i>uncultured_bacterium</i>                            | 0           | 0.333155   | 0.111655   |
| OTU2695  | <i>uncultured_bacterium</i>                            | 0.004681    | 0.330612   | 0.007975   |
| OTU4037  | <i>uncultured_bacterium</i>                            | 0           | 0.325526   | 0          |

|         |                                           |          |          |          |
|---------|-------------------------------------------|----------|----------|----------|
| OTU0911 | <i>Lactobacillus_reuteri_ATCC_53608</i>   | 0.042133 | 0.315353 | 0.015951 |
| OTU0024 | <i>uncultured_bacterium</i>               | 0.042133 | 0.31281  | 0.135581 |
| OTU0505 | <i>uncultured_bacterium</i>               | 0.028089 | 0.297551 | 0.462569 |
| OTU1127 | <i>uncultured_bacterium</i>               | 0.060859 | 0.292465 | 0.151531 |
| OTU3078 | <i>uncultured_bacterium</i>               | 0.046814 | 0.289921 | 0.15419  |
| OTU0759 | <i>uncultured_bacterium</i>               | 0.018726 | 0.287378 | 0.704487 |
| OTU1307 | <i>uncultured_Citrobacter_sp.</i>         | 0.102991 | 0.277206 | 0.539664 |
| OTU2422 | <i>uncultured_bacterium</i>               | 0.060859 | 0.274662 | 0.172799 |
| OTU0133 | <i>uncultured_bacterium</i>               | 0.051496 | 0.267033 | 0.039877 |
| OTU3665 | <i>Bifidobacterium_thermophilum_RBL67</i> | 0.107673 | 0.261947 | 0.840068 |
| OTU0125 | <i>Lactobacillus_sp._RA2113</i>           | 0.004681 | 0.259403 | 0.106338 |
| OTU4811 | <i>uncultured_bacterium</i>               | 0        | 0.259403 | 0.079753 |
| OTU4957 | <i>uncultured_bacterium</i>               | 0        | 0.239058 | 0.053169 |
| OTU0436 | <i>Lactobacillus_sp._ACD7</i>             | 0.028089 | 0.233972 | 0.489154 |
| OTU5189 | <i>uncultured_bacterium</i>               | 0        | 0.233972 | 0.015951 |
| OTU5292 | <i>uncultured_bacterium</i>               | 0        | 0.233972 | 0        |
| OTU0029 | <i>Pseudomonas_plecoglossicida</i>        | 0.023407 | 0.231428 | 0.364207 |
| OTU2548 | <i>uncultured_bacterium</i>               | 0        | 0.226342 | 0.281795 |
| OTU0536 | <i>uncultured_bacterium</i>               | 0.018726 | 0.213626 | 0.412059 |
| OTU4488 | <i>uncultured_bacterium</i>               | 0.004681 | 0.213626 | 0.042535 |
| OTU0907 | <i>uncultured_bacterium</i>               | 0.037451 | 0.203454 | 0.010634 |
| OTU0028 | <i>uncultured_bacterium</i>               | 3.927719 | 0.185651 | 0.893237 |
| OTU0291 | <i>uncultured_bacterium</i>               | 0.009363 | 0.162763 | 0.414717 |
| OTU3034 | <i>uncultured_bacterium</i>               | 0        | 0.15259  | 1.685453 |
| OTU2458 | <i>uncultured_bacterium</i>               | 0.018726 | 0.144961 | 0.401425 |
| OTU4039 | <i>uncultured_bacterium</i>               | 1.980244 | 0.124615 | 0.132922 |
| OTU0032 | <i>Lactobacillus_reuteri_ATCC_53608</i>   | 0.416647 | 0.114443 | 0.808167 |
| OTU6015 | <i>uncultured_bacterium</i>               | 0.149806 | 0.09664  | 0.220651 |
| OTU0143 | <i>Enterococcus_casseliflavus</i>         | 0.042133 | 0.094097 | 0.329647 |
| OTU4352 | <i>uncultured_bacterium</i>               | 0.03277  | 0.094097 | 0.313696 |
| OTU4648 | <i>uncultured_bacterium</i>               | 1.151631 | 0.089011 | 0.093046 |
| OTU1444 | <i>uncultured_bacterium</i>               | 0.257479 | 0.078838 | 0.159507 |
| OTU1401 | <i>Lactobacillus_reuteri_ATCC_53608</i>   | 0.215346 | 0.071209 | 0.122288 |
| OTU5334 | <i>uncultured_bacterium</i>               | 0.585179 | 0.066122 | 0.042535 |
| OTU0031 | <i>uncultured_bacterium</i>               | 0.477506 | 0.053407 | 0.707146 |
| OTU5171 | <i>uncultured_bacterium</i>               | 0.004681 | 0.053407 | 0.231285 |
| OTU4387 | <i>uncultured_bacterium</i>               | 1.320163 | 0.043234 | 0.287112 |
| OTU1541 | <i>Lactobacillus_reuteri_ATCC_53608</i>   | 0.308974 | 0.043234 | 0.087729 |
| OTU5766 | <i>uncultured_bacterium</i>               | 0.62263  | 0.040691 | 0.066461 |
| OTU4986 | <i>uncultured_bacterium</i>               | 0.575816 | 0.033061 | 0.026584 |
| OTU5444 | <i>uncultured_bacterium</i>               | 0.346426 | 0.025432 | 0.047852 |
| OTU0186 | <i>uncultured_bacterium</i>               | 0.223407 | 0.023906 | 0.013026 |
| OTU5266 | <i>uncultured_bacterium</i>               | 0.889471 | 0.022889 | 0.093046 |
| OTU5452 | <i>uncultured_bacterium</i>               | 0.243434 | 0.022889 | 0.210017 |

|         |                                        |          |          |          |
|---------|----------------------------------------|----------|----------|----------|
| OTU2219 | <i>uncultured_bacterium</i>            | 0        | 0.022889 | 0.207359 |
| OTU1834 | <i>uncultured_bacterium</i>            | 0.215346 | 0.020345 | 0.066461 |
| OTU0015 | <i>uncultured_Citrobacter_sp.</i>      | 0.004681 | 0.020345 | 0.199383 |
| OTU5268 | <i>uncultured_bacterium</i>            | 0.68817  | 0.017802 | 0.026584 |
| OTU5054 | <i>uncultured_bacterium</i>            | 0.22939  | 0.017802 | 0.039877 |
| OTU1482 | <i>uncultured_Lactobacillus_sp.</i>    | 0.318337 | 0.015259 | 0.11963  |
| OTU3731 | <i>Bifidobacteriaceae_genomosp._C1</i> | 0.26216  | 0.015259 | 0.319013 |
| OTU5877 | <i>uncultured_bacterium</i>            | 0        | 0.012716 | 0.178116 |
| OTU2978 | <i>uncultured_bacterium</i>            | 0        | 0.010173 | 0.180774 |
| OTU1614 | <i>uncultured_bacterium</i>            | 0.257479 | 0.005086 | 0.013292 |
| OTU1507 | <i>uncultured_bacterium</i>            | 0.220027 | 0.005086 | 0.010634 |
| OTU4051 | <i>uncultured_bacterium</i>            | 0        | 0.005086 | 1.374415 |
| OTU1615 | <i>uncultured_bacterium</i>            | 0.257479 | 0.002543 | 0        |
| OTU5622 | <i>uncultured_bacterium</i>            | 0        | 0.002543 | 0.337622 |
| OTU1635 | <i>uncultured_bacterium</i>            | 0.992463 | 0        | 0        |
| OTU3774 | <i>Aeriscardovia_aeriphila</i>         | 0.716259 | 0        | 0.786899 |
| OTU4064 | <i>uncultured_bacterium</i>            | 0        | 0        | 0.481178 |
| OTU4301 | <i>uncultured_bacterium</i>            | 0        | 0        | 0.345598 |

---
